# Supplementary material for: Migration motives and integration of international human resources of health in the United Kingdom: systematic review and meta-synthesis of qualitative studies using framework analysis
Source: Hum Resour Health. 2018 Jun 27;16:27. doi: 10.1186/s12960-018-0293-9 (PMC6020357; doi:10.1186/s12960-018-0293-9)
Supplement: Supplementary file 2 — Eligibility screening checklist. (PDF 408 kb) [file 12960_2018_293_MOESM2_ESM.pdf]

REVIEWER INITIAL: \_\_\_\_\_

**Eligibility screening checklist**

**Migration motives and integration of international nursing, medical and dental graduates: a synthesis of qualitative studies**

| Inclusion criteria                                                                                                                                                                       | Yes     | Group | No      | Unclear |
|------------------------------------------------------------------------------------------------------------------------------------------------------------------------------------------|---------|-------|---------|---------|
| Do the participants belong to one or all of these groups? ITNs, IMGs, IDGs?                                                                                                              |         |       |         |         |
| Is the study conducted in the UK or reporting about UK                                                                                                                                   |         |       |         |         |
| Study design<br>A. Does it have primary qualitative data or separately reported data for each outcome<br>B. Is the study in English<br>C. Was it published between Jan 2000- Jan 2017    |         |       |         |         |
| Do the study outcomes refer to all or one of the following issues:<br>A. Migration motives of the ITNs, IMGs and IDGs<br>B. Integration ITNs, IMGs and IDGs in the destination countries |         |       |         |         |
| Final decision:                                                                                                                                                                          | Include |       | Exclude | Discuss |
